# Supplementary material for: Paper-Based Airborne Bacteria Collection and DNA Extraction Kit
Source: Biosensors (Basel). 2021 Oct 7;11(10):375. doi: 10.3390/bios11100375 (PMC8533686; doi:10.3390/bios11100375)
Supplement: Supplementary file 1 [file biosensors-11-00375-s001.zip › biosensors-1401820-supplementary.pdf]

# Paper-Based Airborne Bacteria Collection and DNA Extraction Kit

Youngung Seok <sup>1</sup>, Joonseok Lee <sup>2</sup> and Min-Gon Kim <sup>3,\*</sup>

<sup>1</sup> Department of Mechanical Engineering and Applied Mechanics, School of Engineering and Applied Science, University of Pennsylvania, 216 Towne Building, 220 S. 33rd Street, Philadelphia, PA 19104, USA; yuseok@seas.upenn.edu

<sup>2</sup> Department of Chemistry, Hanyang University, Seoul 04763, Korea; joonseoklee@hanyang.ac.kr

<sup>3</sup> Department of Chemistry, Gwangju Institute of Science and Technology (GIST), School of Physics and Chemistry, 123 Cheomdan-gwagiro, Gwangju 61005, Korea

\* Correspondence: mkim@gist.ac.kr

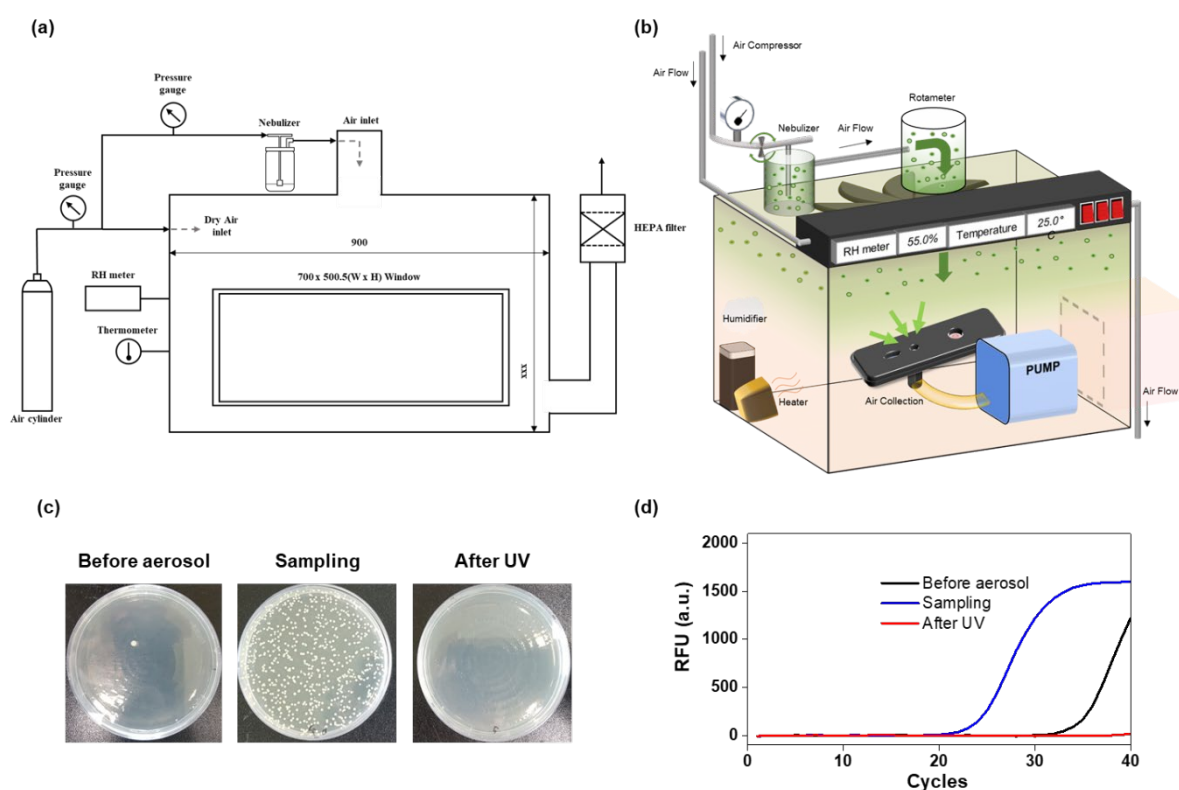

**Figure S1.** Cabinet system for bacterial aerosol experiments. (a) Drawing of the cabinet system, (b) schematic of overall cabinet facility, (c) bacteria detection result by colony counting using impactor sampler in the cabinet, and (d) bacteria detection result by the paper kit and qPCR in the cabinet.

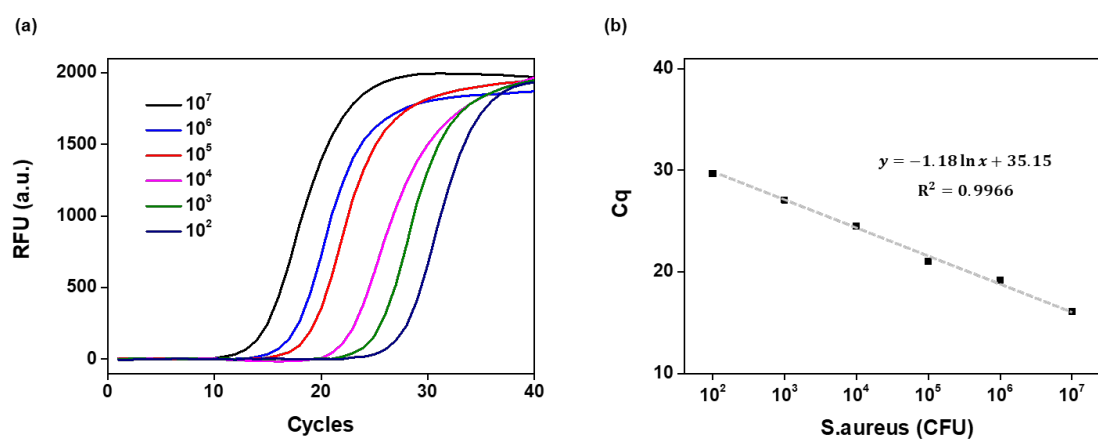

**Figure S2.** Quantitative real-time PCR (qPCR) analysis. (a) Real-time PCR curves of various ranges of *S. aureus* bacteria. (b) Linear regression between Cq value and quantity of *S. aureus*.

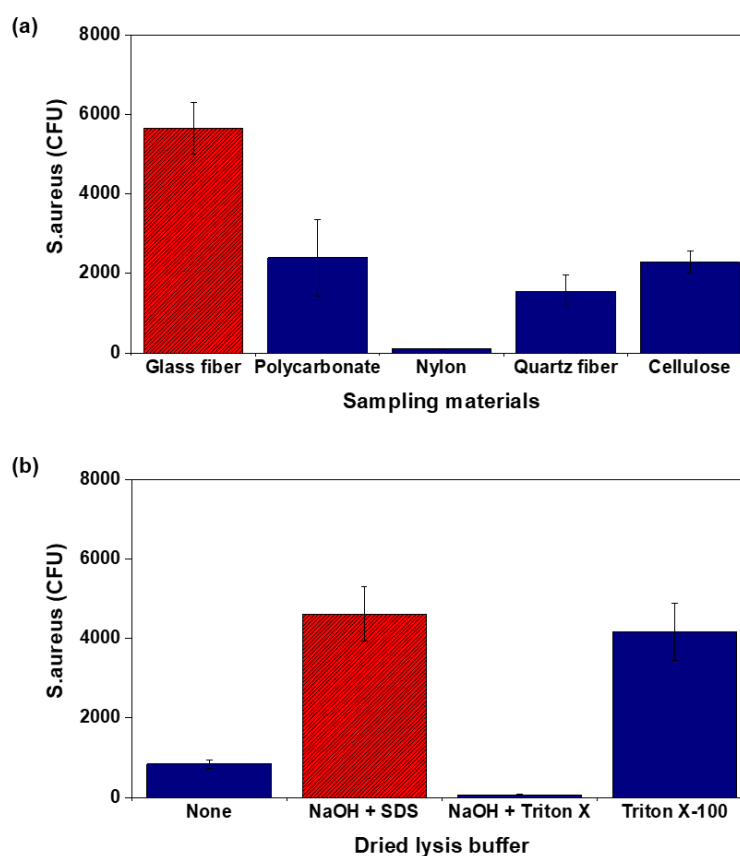

**Figure S3.** (a) Collection results of airborne bacteria on the sampling pad in the kit using various materials. (b) Comparison of DNA extraction results for lysis buffer component dried on the sampling pad. All CFU values were measured by qPCR (N = 3).

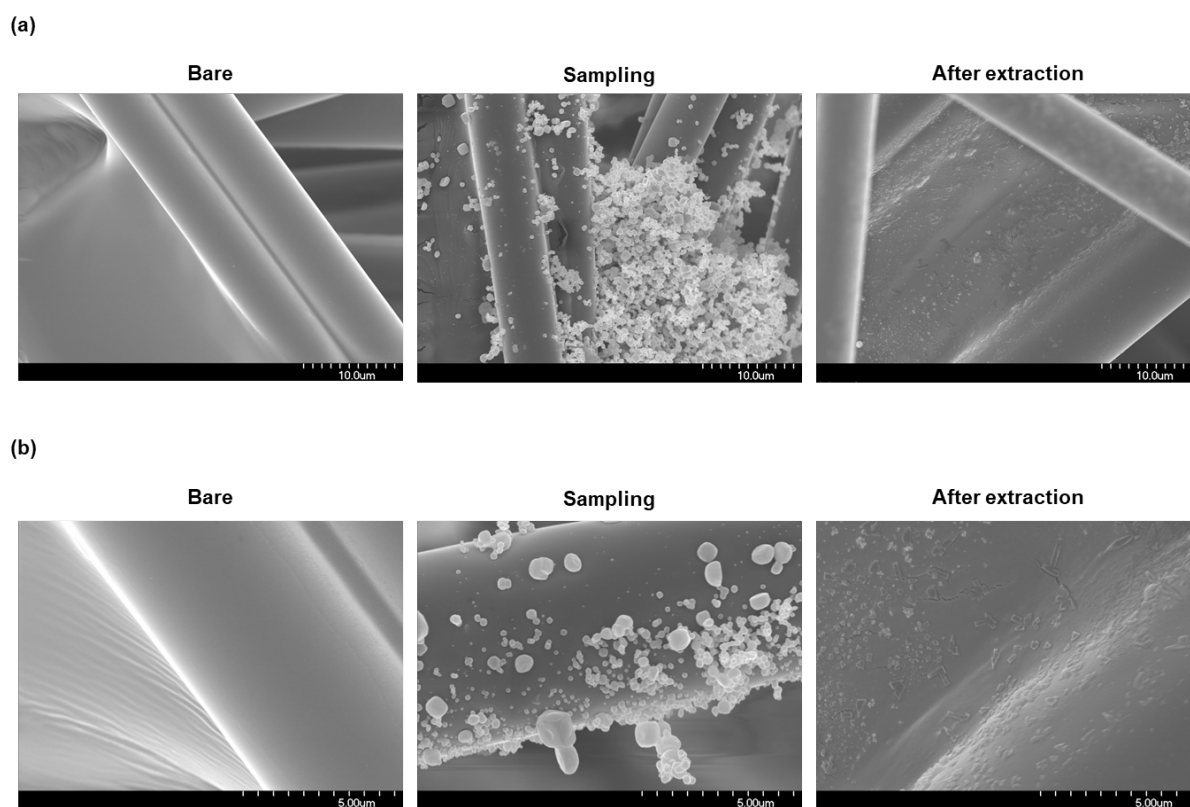

**Figure S4.** SEM images of sampling pad on the paper kit. Microscopic image of pad surface was captured without any treatment (Bare), for air sampling of  $10^4$  CFU *S. aureus* aerosolized condition (Sampling), and after whole extraction process (After extraction). (a) 3000 times enlarged, and (b) 10,000 times enlarged.
